# Supplementary material for: Cigarette Smoking Is Negatively Associated with the Prevalence of Type 2 Diabetes in Middle-Aged Men with Normal Weight but Positively Associated with Stroke in Men
Source: Hindawi journal article supplement (doi:10.1155/2019/1853018), 2019-09-11
Supplement: f1 [file 1853018.f1.pdf]

**Supplementary Table 1 Characteristics of the population according to the status of glucose metabolism (N=8196)**

| Variables                | Men                |                         |                         | Women<br>(D)<br>n=5422 | <i>P</i> |         |         |         |
|--------------------------|--------------------|-------------------------|-------------------------|------------------------|----------|---------|---------|---------|
|                          | All                | BMI<25kg/m <sup>2</sup> | BMI≥25kg/m <sup>2</sup> |                        | B vs. C  | B vs. D | C vs. D | A vs. D |
|                          | (A)<br>n=2774      | (B)<br>n=1433           | (C)<br>n=1341           |                        |          |         |         |         |
| Age (years)              | 59.82±10.69        | 60.53±10.75             | 59.04±10.58             | 58.25±10.25            | <0.001   | <0.001  | 0.013   | <0.001  |
| BMI (kg/m <sup>2</sup> ) | 24.99±3.31         | 22.53±1.80              | 27.63±2.41              | 24.74±3.51             | <0.001   | <0.001  | <0.001  | 0.001   |
| WC (cm)                  | 90.31±8.50         | 85.74±7.07              | 95.17±7.02              | 88.23±9.69             | <0.001   | <0.001  | <0.001  | <0.001  |
| WHR                      | 0.93±0.06          | 0.91±0.06               | 0.95±0.06               | 0.92±0.08              | <0.001   | <0.001  | <0.001  | <0.001  |
| FPG (mmol/L)             | 5.91±1.64          | 5.85±1.66               | 5.98±1.60               | 5.74±1.47              | 0.028    | 0.017   | <0.001  | <0.001  |
| 2hPG (mmol/L)            | 8.33±3.68          | 8.26±3.81               | 8.40±3.53               | 8.11±3.45              | 0.270    | 0.164   | 0.006   | 0.010   |
| HbA1c (%)                | 6.05±1.01          | 5.99±1.00               | 6.13±1.01               | 6.00±0.95              | <0.001   | 0.468   | <0.001  | 0.040   |
| TG (mmol/L)              | 1.19(0.87-1.69)    | 1.05(0.81-1.51)         | 1.41(1.02-2.06)         | 1.22(0.88-1.81)        | <0.001   | <0.001  | <0.001  | 0.011   |
| TC (mmol/L)              | 4.61±0.96          | 4.58±0.96               | 4.62±0.97               | 4.81±1.01              | 0.332    | <0.001  | <0.001  | <0.001  |
| LDL-C<br>(mmol/L)        | 2.66±0.76          | 2.61±0.75               | 2.70±0.77               | 2.74±0.78              | 0.003    | <0.001  | 0.091   | <0.001  |
| HDL-C<br>(mmol/L)        | 1.24±0.33          | 1.32±0.36               | 1.16±0.28               | 1.34±0.33              | <0.001   | 0.038   | <0.001  | <0.001  |
| FINS(μU/mL)              | 5.50(3.90-7.90)    | 4.50(3.30-6.20)         | 6.90(5.10-9.60)         | 6.20(4.50-8.60)        | <0.001   | <0.001  | <0.001  | <0.001  |
| HOMA-IR                  | 1.41(0.95-2.09)    | 1.11(0.78-1.62)         | 1.79(1.24-2.52)         | 1.52(1.06-2.21)        | <0.001   | <0.001  | 0.970   | <0.001  |
| HOMA-β SBP<br>(mmHg) DBP | 54.38(36.97-80.29) | 46.41(31.54-66.15)      | 65.76(44.37-94.79)      | 64.20(45.40-89.95)     | <0.001   | <0.001  | <0.001  | <0.001  |
| (mmHg)                   | 131.60±21.35       | 129.19±21.40            | 134.17±21.03            | 128.87±21.55           | <0.001   | 0.622   | <0.001  | <0.001  |
| Smoking status           | 79.05±13.59        | 77.10±13.58             | 81.13±13.29             | 75.44±12.58            | <0.001   | <0.001  | <0.001  | <0.001  |
| never-smoker<br>(%)      | 1139(41.1%)        | 568(39.6%)              | 571(42.6%)              | 5323(98.2%)            | -        | -       | -       |         |
| ex-smoker (%)            | 280(10.1%)         | 134(9.4%)               | 146(10.9%)              | 12(0.2%)               | -        | -       |         |         |
| current smoker<br>(%)    | 1355(48.8%)        | 731(51.0%)              | 624(46.5%)              | 87(1.6%)               | -        | -       |         |         |
| T2DM(%)                  | 741(26.7%)         | 388(27.1%)              | 353(26.3%)              | 1192(22.0%)            | 0.654    | <0.001  | 0.001   | <0.001  |
| nonfatal stroke<br>(%)   | 67(2.4%)           | 33(2.3%)                | 34(2.5%)                | 121(2.2%)              | 0.690    | 0.871   | 0.506   | 0.599   |

**Supplementary Table 2 Association of smoking status with pre-diabetes(N=6263)**

|                          | Model 1                |              | Model 2                |              | Model 3                |              |
|--------------------------|------------------------|--------------|------------------------|--------------|------------------------|--------------|
|                          | <i>OR</i>              | <i>P</i>     | <i>OR</i>              | <i>P</i>     | <i>OR</i>              | <i>P</i>     |
| <b>Smoking status</b>    |                        |              |                        |              |                        |              |
| Never-smoker             | 1                      |              | 1                      |              | 1                      |              |
| Ex-smoker                | <b>1.37(1.02-1.85)</b> | <b>0.034</b> | 0.90(0.64-1.24)        | 0.503        | 0.91(0.65-1.26)        | 0.553        |
| Current smoker           | <b>0.82(0.71-0.95)</b> | <b>0.007</b> | <b>0.75(0.62-0.92)</b> | <b>0.005</b> | <b>0.77(0.63-0.93)</b> | <b>0.008</b> |
| <b>Daily consumption</b> |                        |              |                        |              |                        |              |
| Never-smoker             | 1                      |              | 1                      |              | 1                      |              |
| 1-19 cigarettes/day      | <b>0.80(0.65-0.98)</b> | <b>0.034</b> | <b>0.69(0.54-0.88)</b> | <b>0.003</b> | <b>0.68(0.53-0.88)</b> | <b>0.003</b> |
| ≥20 cigarettes/day       | 0.83(0.69-1.00)        | 0.054        | <b>0.78(0.61-0.98)</b> | <b>0.038</b> | <b>0.78(0.61-0.99)</b> | <b>0.040</b> |
| <b>Smoking Duration</b>  |                        |              |                        |              |                        |              |
| Never-smoker             | 1                      |              | 1                      |              | 1                      |              |
| <20 years                | 0.84(0.67-1.05)        | 0.122        | <b>0.73(0.57-0.95)</b> | <b>0.018</b> | <b>0.69(0.52-0.93)</b> | <b>0.016</b> |
| ≥20 years                | 0.91(0.78-1.07)        | 0.260        | <b>0.80(0.65-0.98)</b> | <b>0.034</b> | <b>0.75(0.60-0.93)</b> | <b>0.010</b> |
| <b>Pack-year</b>         |                        |              |                        |              |                        |              |
| Never-smoker             | 1                      |              | 1                      |              | 1                      |              |
| 1-19 pack-years          | <b>0.78(0.64-0.95)</b> | <b>0.013</b> | <b>0.71(0.56-0.90)</b> | <b>0.005</b> | <b>0.71(0.54-0.90)</b> | <b>0.005</b> |
| ≥20 pack-years           | 0.86(0.71-1.04)        | 0.119        | <b>0.76(0.60-0.97)</b> | <b>0.025</b> | <b>0.76(0.60-0.98)</b> | <b>0.029</b> |

Model 1: No adjusted variables

Model 2: Adjusted for age, BMI, gender, educational level, physical activity, alcohol consumption and family history of diabetes

Model 3: Adjusted for Model 2 plus SBP, DBP, TG, TC, HDL-C and LDL-C

The sample size was 6263 in the analysis of the subgroup of smoking status. \* Ex-smokers were not included in the analysis of the subgroup of daily consumption, smoking duration and pack-year (n=6065).

**Supplementary Table 3 Association between cigarette smoking and pre-diabetes in men stratified by obesity(N=1846)**

| Subgroup                         | Model 1                |                  | Model 2                |                  | Model 3                |                  |
|----------------------------------|------------------------|------------------|------------------------|------------------|------------------------|------------------|
|                                  | OR                     | P                | OR                     | P                | OR                     | P                |
| <b>BMI&lt;25kg/m<sup>2</sup></b> |                        |                  |                        |                  |                        |                  |
| Never-smoker                     | 1                      |                  | 1                      |                  | 1                      |                  |
| 1-19 pack-years                  | <b>0.52(0.36-0.74)</b> | <b>&lt;0.001</b> | <b>0.54(0.37-0.80)</b> | <b>0.002</b>     | <b>0.52(0.35-0.77)</b> | <b>0.001</b>     |
| ≥20 pack-years                   | <b>0.63(0.45-0.88)</b> | <b>0.007</b>     | <b>0.61(0.42-0.89)</b> | <b>0.009</b>     | <b>0.60(0.42-0.87)</b> | <b>0.008</b>     |
| <b>BMI≥25kg/m<sup>2</sup></b>    |                        |                  |                        |                  |                        |                  |
| Never-smoker                     | 1                      |                  | 1                      |                  | 1                      |                  |
| 1-19 pack-years                  | 0.76(0.54-1.08)        | 0.124            | 0.94(0.65-1.36)        | 0.942            | 0.96(0.66-1.39)        | 0.824            |
| ≥20 pack-years                   | <b>0.71(0.51-0.99)</b> | <b>0.044</b>     | 0.88(0.60-1.29)        | 0.524            | 0.89(0.62-1.28)        | 0.525            |
| <b>WC&lt;90cm</b>                |                        |                  |                        |                  |                        |                  |
| Never-smoker                     | 1                      |                  | 1                      |                  | 1                      |                  |
| 1-19 pack-years                  | <b>0.38(0.25-0.58)</b> | <b>&lt;0.001</b> | <b>0.44(0.28-0.69)</b> | <b>&lt;0.001</b> | <b>0.42(0.27-0.66)</b> | <b>&lt;0.001</b> |
| ≥20 pack-years                   | 0.70(0.49-1.01)        | 0.056            | 0.77(0.52-1.14)        | 0.196            | 0.73(0.49-1.08)        | 0.116            |
| <b>WC≥90cm</b>                   |                        |                  |                        |                  |                        |                  |
| Never-smoker                     | 1                      |                  | 1                      |                  | 1                      |                  |
| 1-19 pack-years                  | 0.85(0.62-1.16)        | 0.310            | 0.97(0.69-1.36)        | 0.858            | 0.99(0.71-1.39)        | 0.958            |
| ≥20 pack-years                   | <b>0.64(0.47-0.88)</b> | <b>0.006</b>     | 0.74(0.53-1.03)        | 0.076            | 0.76(0.54-1.07)        | 0.112            |
| <b>WHR&lt;1.0</b>                |                        |                  |                        |                  |                        |                  |
| Never-smoker                     | 1                      |                  | 1                      |                  | 1                      |                  |
| 1-19 pack-years                  | <b>0.54(0.41-0.72)</b> | <b>0.001</b>     | <b>0.63(0.47-0.84)</b> | <b>0.002</b>     | <b>0.62(0.46-0.83)</b> | <b>0.001</b>     |
| ≥20 pack-years                   | <b>0.66(0.51-0.85)</b> | <b>0.001</b>     | <b>0.73(0.55-0.96)</b> | <b>0.024</b>     | <b>0.72(0.55-0.95)</b> | <b>0.020</b>     |
| <b>WHR≥1.0</b>                   |                        |                  |                        |                  |                        |                  |
| Never-smoker                     | 1                      |                  | 1                      |                  | 1                      |                  |
| 1-19 pack-years                  | 1.15(0.63-2.10)        | 0.656            | 1.27(0.67-2.40)        | 0.452            | 1.30(0.65-2.61)        | 0.460            |
| ≥20 pack-years                   | 0.72(0.39-1.35)        | 0.311            | 0.88(0.46-1.71)        | 0.709            | 0.84(0.42-1.69)        | 0.626            |

Model 1: No adjusted variables

Model 2: Adjusted for age, BMI, gender, educational level, physical activity, alcohol consumption and family history of diabetes

Model 3: Adjusted for Model 2 plus SBP, DBP, TG, TC, HDL-C and LDL-C
